# Supplementary material for: Accuracy and role of consumer facing wearable technology for continuous monitoring during endoscopic procedures
Source: Frontiers journal article supplement (doi:10.3389/fdgth.2024.1422929), 2024-09-04
Supplement: Data_Sheet_1.pdf [file Data_Sheet_1.pdf]

# Procedure Smart Watch Survey

Thank you for recently participating in our study regarding smart watches and endoscopic procedures.

We would like to ask you a few questions regarding smart watches like the Apple Watch. Please complete the survey below.

| Procedure Experience |                                                                                                                      | 0                                       | 1                                  | 2                                                       | 3                               | 4                                    | 5                        | 6                     | 7                     | 8                     | 9                     | 10                    |
|----------------------|----------------------------------------------------------------------------------------------------------------------|-----------------------------------------|------------------------------------|---------------------------------------------------------|---------------------------------|--------------------------------------|--------------------------|-----------------------|-----------------------|-----------------------|-----------------------|-----------------------|
| 1)                   | What was your level of awareness during your procedure? (if 0 is not aware at all and 10 is fully aware)             | <input type="radio"/>                   | <input type="radio"/>              | <input type="radio"/>                                   | <input type="radio"/>           | <input type="radio"/>                | <input type="radio"/>    | <input type="radio"/> | <input type="radio"/> | <input type="radio"/> | <input type="radio"/> | <input type="radio"/> |
| 2)                   | What was your level of discomfort or pain during your procedure? (if 0 is none at all, and 10 is the worst possible) | <input type="radio"/>                   | <input type="radio"/>              | <input type="radio"/>                                   | <input type="radio"/>           | <input type="radio"/>                | <input type="radio"/>    | <input type="radio"/> | <input type="radio"/> | <input type="radio"/> | <input type="radio"/> | <input type="radio"/> |
|                      |                                                                                                                      | Strongly disagree                       |                                    | Disagree                                                |                                 | Neither agree or disagree            |                          | Agree                 |                       | Strongly Agree        |                       |                       |
| 3)                   | The smart watch was easy to wear                                                                                     | <input type="radio"/>                   |                                    | <input type="radio"/>                                   |                                 | <input type="radio"/>                |                          | <input type="radio"/> |                       | <input type="radio"/> |                       |                       |
| 4)                   | The smart watch was comfortable to wear                                                                              | <input type="radio"/>                   |                                    | <input type="radio"/>                                   |                                 | <input type="radio"/>                |                          | <input type="radio"/> |                       | <input type="radio"/> |                       |                       |
| 5)                   | The smart watch did not interfere with my procedure                                                                  | <input type="radio"/>                   |                                    | <input type="radio"/>                                   |                                 | <input type="radio"/>                |                          | <input type="radio"/> |                       | <input type="radio"/> |                       |                       |
| 6)                   | If given the opportunity, I would wear a smart watch for monitoring during future procedures                         | <input type="radio"/>                   |                                    | <input type="radio"/>                                   |                                 | <input type="radio"/>                |                          | <input type="radio"/> |                       | <input type="radio"/> |                       |                       |
|                      |                                                                                                                      |                                         |                                    |                                                         |                                 |                                      |                          |                       |                       |                       |                       |                       |
| 7)                   | How satisfied were you with wearing the watch during your procedure                                                  |                                         |                                    |                                                         |                                 |                                      |                          |                       |                       |                       |                       |                       |
|                      |                                                                                                                      | <input type="radio"/> Very dissatisfied | <input type="radio"/> Dissatisfied | <input type="radio"/> Neither satisfied or dissatisfied | <input type="radio"/> Satisfied | <input type="radio"/> Very satisfied |                          |                       |                       |                       |                       |                       |
|                      |                                                                                                                      | Strongly disagree                       |                                    | Disagree                                                |                                 | Neither agree or disagree            |                          | Agree                 |                       | Strongly agree        |                       |                       |
| 8)                   | Most people have wearable smart devices (like a watch)                                                               | <input type="radio"/>                   |                                    | <input type="radio"/>                                   |                                 | <input type="radio"/>                |                          | <input type="radio"/> |                       | <input type="radio"/> |                       |                       |
| 9)                   | Smart watches are useful for general wellness                                                                        | <input type="radio"/>                   |                                    | <input type="radio"/>                                   |                                 | <input type="radio"/>                |                          | <input type="radio"/> |                       | <input type="radio"/> |                       |                       |
| 10)                  | Smart watches can accurately measure things like heart rate and oxygen levels                                        | <input type="radio"/>                   |                                    | <input type="radio"/>                                   |                                 | <input type="radio"/>                |                          | <input type="radio"/> |                       | <input type="radio"/> |                       |                       |
| 11)                  | Patients should have the option to wear smart devices like a watch during their procedures                           | <input type="radio"/>                   |                                    | <input type="radio"/>                                   |                                 | <input type="radio"/>                |                          | <input type="radio"/> |                       | <input type="radio"/> |                       |                       |
|                      |                                                                                                                      |                                         |                                    |                                                         |                                 |                                      |                          |                       |                       |                       |                       |                       |
| 12)                  | Do you personally use a smart watch? (eg. Apple Watch or Fitbit)?                                                    |                                         |                                    |                                                         |                                 | <input type="radio"/> Yes            | <input type="radio"/> No |                       |                       |                       |                       |                       |

| If yes, how important are the following features?         |                             |                       |                       |                       |                       |
|-----------------------------------------------------------|-----------------------------|-----------------------|-----------------------|-----------------------|-----------------------|
|                                                           | 1 - Not important<br>at all | 2                     | 3                     | 4                     | 5 - Very<br>important |
| 13) Activity measurement (steps, standing/sitting, sleep) | <input type="radio"/>       | <input type="radio"/> | <input type="radio"/> | <input type="radio"/> | <input type="radio"/> |
| 14) Health monitoring (heart rate, oxygen, heart rhythm)  | <input type="radio"/>       | <input type="radio"/> | <input type="radio"/> | <input type="radio"/> | <input type="radio"/> |
| 15) Communication (calls, texts)                          | <input type="radio"/>       | <input type="radio"/> | <input type="radio"/> | <input type="radio"/> | <input type="radio"/> |

# Wearable Tech Provider Survey

Thank you for playing a role in the Wearable Technology project. Your response to this very brief, 8 question survey would be greatly appreciated.

- 1) Department
- ☐ Gastroenterology
- ☐ Anesthesia

Provider Perspectives on Consumer-Facing Wearable Technology

|                                                                                                     | Strongly disagree     | Disagree              | Neither agree or disagree | Agree                 | Strongly agree        |
|-----------------------------------------------------------------------------------------------------|-----------------------|-----------------------|---------------------------|-----------------------|-----------------------|
| 2) Most of my patients have a smart watch                                                           | <input type="radio"/> | <input type="radio"/> | <input type="radio"/>     | <input type="radio"/> | <input type="radio"/> |
| 3) Patients should have the option to wear smart devices like a watch during their procedures       | <input type="radio"/> | <input type="radio"/> | <input type="radio"/>     | <input type="radio"/> | <input type="radio"/> |
| 4) I would feel comfortable with a patient wearing a smart watch during a procedure                 | <input type="radio"/> | <input type="radio"/> | <input type="radio"/>     | <input type="radio"/> | <input type="radio"/> |
| 5) I am aware of Mayo Clinic policies regarding smart devices in procedural areas                   | <input type="radio"/> | <input type="radio"/> | <input type="radio"/>     | <input type="radio"/> | <input type="radio"/> |
| 6) Mayo Clinic should have a policy regarding the use of wearable smart devices in procedural areas | <input type="radio"/> | <input type="radio"/> | <input type="radio"/>     | <input type="radio"/> | <input type="radio"/> |
| 7) Smart watches can accurately measure vital signs like heart rate and oxygen levels               | <input type="radio"/> | <input type="radio"/> | <input type="radio"/>     | <input type="radio"/> | <input type="radio"/> |
| 8) Smart watches can be used to monitor a patient during a procedure                                | <input type="radio"/> | <input type="radio"/> | <input type="radio"/>     | <input type="radio"/> | <input type="radio"/> |
| 9) Smart watch data would be permissible evidence in a court room (for example, a malpractice case) | <input type="radio"/> | <input type="radio"/> | <input type="radio"/>     | <input type="radio"/> | <input type="radio"/> |
